# Supplementary material for: Design of Potent and Controllable Anticoagulants Using DNA Aptamers and Nanostructures
Source: PubMed Central journal article supplement (PMC6273181; doi:10.3390/molecules21020202), 2016-02-06
Supplement: molecules-21-00202-s001.pdf [file molecules-21-00202-s001.pdf]

# Supplementary Materials: Design of Potent and Controllable Anticoagulants Using DNA Aptamers and Nanostructures

Abhijit Rangnekar, Jessica A. Nash, Bethany Goodfred, Yaroslava G. Yingling and Thomas H. LaBean

## Assembly Constituents and DNA Sequences (5' to 3')

| Sample   | Strands                |
|----------|------------------------|
| 1HT-BnnA | W1-2_Atop + W1-2_Bbot  |
| 1HT-BnAn | W1-2_Atop + W1-1_Bbot  |
| 1HT-BnnP | W1-2_Ptop + W1-2_Bbot  |
| 1HT-BnPn | W1-2_Ptop + W1-1_Bbot  |
| 2HT-AnnB | W2-2_AB + W2-1_noApt   |
| 2HT-BnAn | W2-2_Btop + W2-1_Abot  |
| 2HT-BAnn | W2-2_Btop + W2-1_Atop  |
| 2HT-PnnB | W2-2_PB + W2-1_noApt   |
| 2HT-BnPn | W2-2_Btop + W2-1_Pbot  |
| 2HT-BPnn | W2-2_Btop + W2-1_Ptop  |
| 3HT-BAnn | W3-2_Btop + W 3-1_Atop |
| 3HT-BnAn | W3-2_BA + W 3-1_noApt  |
| 3HT-AnnB | W3-2_Atop + W3-1_Bbot  |
| 3HT-BPnn | W3-2_Btop + W3-1_Ptop  |
| 3HT-BnPn | W3-2_BP + W3-1_noApt   |
| 3HT-PnnB | W3-2_Ptop + W3-1_Bbot  |
| 4HT-AnnB | W4-2_AB + W4-1_noApt   |
| 4HT-BnAn | W4-2_Btop + W4-1_Abot  |
| 4HT-BAnn | W4-2_Btop + W4-1_Atop  |
| 4HT-PnnB | W4-2_PB + W4-1_noApt   |
| 4HT-BnPn | W4-2_Btop + W4-1_Pbot  |
| 4HT-BPnn | W4-2_Btop + W4-1_Ptop  |
| 2HT-BPPn | W2-2_Btop + W2-1_PP    |
| 2HT-PPPB | W2-2_PB + W2-1_PP      |
| 2HT-PPBB | W2-2_PB + W2-1_PB      |
| 2HT-BPPB | W2-2_BB + W2-1_PP      |
| 2HT-Bnnn | W2-2_Btop + W2-1_noApt |
| 2HT-BnnB | W2-2_BB + W2-1_noApt   |

| Strand                                                             | Sequence *                                                                                                                                                                                                                  |
|--------------------------------------------------------------------|-----------------------------------------------------------------------------------------------------------------------------------------------------------------------------------------------------------------------------|
| Aptamer A                                                          | 5' - GGT TGG TGT GGT TGG - 3'                                                                                                                                                                                               |
| Aptamer B                                                          | 5' - AG TCC GTG GTA GGG CAG GTT GGG GTG ACT - 3'                                                                                                                                                                            |
| Aptamer P                                                          | 5' - CGC CTA GGT TGG GTA GGG TGG TGG CG - 3'                                                                                                                                                                                |
| Aptamer B and A<br>connected via 20 base<br>single-stranded linker | 5' - AGT CCG TGG TAG GGC AGG TTG GGG TGA CTT TCT AGT AGT CCT<br>CCG AGT TAT CAG CGT TGG TTG GTG TGG TTG GTT CGC TGA T - 3'                                                                                                  |
| Aptamer B and P<br>connected via 20 base<br>single-stranded linker | 5' - AGT CCG TGG TAG GGC AGG TTG GGG TGA CTT TCT AGT AGT CCT<br>CCG AGT TCG CCT AGG TTG GGT AGG GTG GTG GCG - 3'                                                                                                            |
| W1-2_Atop                                                          | 5' - ATC AGC GTT GGT TGG TGT GGT TGG TTC GCT GAT TTC TCG GAG<br>GAC TAC TAG - 3'                                                                                                                                            |
| W1-2_Bbot                                                          | 5' - CT AGT AGT CCT CCG AGT TAG TCC GTG GTA GGG CAG GTT GGG<br>GTG ACT - 3'                                                                                                                                                 |
| W1-1_Bbot                                                          | 5' - AGT CCG TGG TAG GGC AGG TTG GGG TGA CTT TCT AGT AGT CCT<br>CCG AG - 3'                                                                                                                                                 |
| W1-2_Ptop                                                          | 5' - CG CCT AGG TTG GGT AGG GTG GTG GCG TTC TCG GAG GAC TAC<br>TAG - 3'                                                                                                                                                     |
| W2-1_noApt                                                         | 5' - TTC TAG TAG TCC TCC GAG TTT TTA ATC CAT GAT CCT AC TT - 3'<br>5' - ATC AGC GTT GGT TGG TGT GGT TGG TTC GCT GAT TTC TCG GAG<br>GAC TAC TAG TTT TGT AGG ATC ATG GAT TA TT AG TCC GTG GTA<br>GGG CAG GTT GGG GTG ACT - 3' |
| W2-2_AB                                                            | 5' - AGT CCG TGG TAG GGC AGG TTG GGG TGA CT TTC TCG GAG GAC<br>TAC TAG TTT TGT AGG ATC ATG GAT TA TT - 3'                                                                                                                   |
| W2-2_Btop                                                          | 5' - TTC TAG TAG TCC TCC GAG TTT TTA ATC CAT GAT CCT AC TT ATC<br>AGC GTT GGT TGG TGT GGT TGG TTC GCT GAT - 3'                                                                                                              |
| W2-1_Abot                                                          | 5' - ATC AGC GTT GGT TGG TGT GGT TGG TTC GCT GAT TTC TAG TAG<br>TCC TCC GAG TTT TTA ATC CAT GAT CCT AC TT - 3'                                                                                                              |
| W2-1_Atop                                                          | 5' - CG CCT AGG TTG GGT AGG GTG GTG GCG TTC TCG GAG GAC TAC<br>TAG TTT TGT AGG ATC ATG GAT TA TT AG TCC GTG GTA GGG CAG<br>GTT GGG GTG ACT - 3'                                                                             |
| W2-2_PB                                                            | 5' - TTC TAG TAG TCC TCC GAG TTT TTA ATC CAT GAT CCT AC TT CG<br>CCT AGG TTG GGT AGG GTG GTG GCG - 3'                                                                                                                       |
| W2-1_Pbot                                                          | 5' - CG CCT AGG TTG GGT AGG GTG GTG GCG TTC TAG TAG TCC TCC<br>GAG TTT TTA ATC CAT GAT CCT AC TT - 3'                                                                                                                       |
| W2-1_Ptop                                                          | 5' - CG CCT AGG TTG GGT AGG GTG GTG GCG TTC TAG TAG TCC TCC<br>GAG TTT TTA ATC CAT GAT CCT AC TT CG CCT AGG TTG GGT AGG<br>GTG GTG GCG - 3'                                                                                 |
| W2-1_PP                                                            | 5' - CG CCT AGG TTG GGT AGG GTG GTG GCG TTC TAG TAG TCC TCC<br>GAG TTT TTA ATC CAT GAT CCT AC TT AG TCC GTG GTA GGG CAG<br>GTT GGG GTG ACT - 3'                                                                             |
| W2-1_PB                                                            | 5' - AG TCC GTG GTA GGG CAG GTT GGG GTG ACT TTC TCG GAG GAC<br>TAC TAG TTT TGT AGG ATC ATG GAT TA TT AG TCC GTG GTA GGG<br>CAG GTT GGG GTG ACT - 3'                                                                         |
| W2-2_BB                                                            | 5' - TTC TAG TAG TCC TCC GAG TTT TTA ATC CAT GAT CCT ACT TTT<br>GGC TAC AGA CTG CAT T TT - 3'                                                                                                                               |
| W3-1_noApt                                                         | 5' - AGT CCG TGG TAG GGC AGG TTG GGG TGA CT TTC TCG GAG GAC<br>TAC TAG TTT TGT AGG ATC ATG GAT TAT TTT AAT GCA GTC TGT AGC<br>C TT - 3'                                                                                     |
| W3-2_Btop                                                          | 5' - ATC AGC GTT GGT TGG TGT GGT TGG TTC GCT GAT TTC TCG GAG<br>GAC TAC TAG TTT TGT AGG ATC ATG GAT TAT TTT AAT GCA GTC TGT<br>AGC C TT - 3'                                                                                |
| W3-2_Atop                                                          | 5' - ATC AGC GTT GGT TGG TGT GGT TGG TTC GCT GAT TTC TAG TAG<br>TCC TCC GAG TTT TTA ATC CAT GAT CCT ACT TTT GGC TAC AGA CTG<br>CAT T TT - 3'                                                                                |
| W3-1_Atop                                                          | 5' - AGT CCG TGG TAG GGC AGG TTG GGG TGA CT TTC TCG GAG GAC<br>TAC TAG TTT TGT AGG ATC ATG GAT TAT TTT AAT GCA GTC TGT AGC<br>C TT ATC AGC GTT GGT TGG TGT GGT TGG TTC GCT GAT - 3'                                         |
| W3-2_BA                                                            | 5' - ATC AGC GTT GGT TGG TGT GGT TGG TTC GCT GAT - 3'                                                                                                                                                                       |

---

|              |                                                                                                                                                                                                                                 |
|--------------|---------------------------------------------------------------------------------------------------------------------------------------------------------------------------------------------------------------------------------|
| W3-1_Bbot    | 5' - TTC TAG TAG TCC TCC GAG TTT TTA ATC CAT GAT CCT ACT TTT<br>GGC TAC AGA CTG CAT T TT <b>AG TCC GTG GTA GGG CAG GTT GGG GTG<br/>ACT</b> - 3'                                                                                 |
| W3-1_Ptop    | 5' - <b>CG CCT AGG TTG GGT AGG GTG GTG GCG</b> TTC TAG TAG TCC TCC<br>GAG TTT TTA ATC CAT GAT CCT ACT TTT GGC TAC AGA CTG CAT T TT<br>- 3'                                                                                      |
| W3-2_BP      | 5' - <b>AGT CCG TGG TAG GGC AGG TTG GGG TGA CT</b> TTC TCG GAG GAC<br>TAC TAG TTT TGT AGG ATC ATG GAT TAT TTT AAT GCA GTC TGT AGC<br>C TT <b>CG CCT AGG TTG GGT AGG GTG GTG GCG</b> - 3'                                        |
| W3-2_Ptop    | 5' - <b>CG CCT AGG TTG GGT AGG GTG GTG GCG</b> TTC TCG GAG GAC TAC TAG<br>TTT TGT AGG ATC ATG GAT TAT TTT AAT GCA GTC TGT AGC C TT - 3'                                                                                         |
| W4-1_noApt   | 5' - TTC TAG TAG TCC TCC GAG TTT TTA ATC CAT GAT CCT ACT TTT<br>GGC TAC AGA CTG CAT TTT TTA GAT CCT ATG CGT TCG TT - 3'                                                                                                         |
| W4-2_AB      | 5' - <b>ATC AGC GTT GGT TGG TGT GGT TGG TTC GCT GAT</b> TTC TCG GAG<br>GAC TAC TAG TTT TGT AGG ATC ATG GAT TAT TTT AAT GCA GTC TGT<br>AGC CTT TTC GAA CGC ATA GGA TCT TTA <b>GTC CGT GGT AGG GCA<br/>GGT TGG GGT GAC T</b> - 3' |
| W4-2_Btop    | 5' - <b>AGT CCG TGG TAG GGC AGG TTG GGG TGA CTT</b> TCT CGG AGG ACT<br>ACT AGT TTT GTA GGA TCA TGG ATT ATT TTA ATG CAG TCT GTA GCC<br>TTT TCG AAC GCA TAG GAT CTT T - 3'                                                        |
| W4-1_Abot    | 5' - TTC TAG TAG TCC TCC GAG TTT TTA ATC CAT GAT CCT ACT TTT<br>GGC TAC AGA CTG CAT TTT TTA GAT CCT ATG CGT TCG TTA <b>TCA GCG<br/>TTG GTT GGT GTG GTT GGT TCG CTG AT</b> - 3'                                                  |
| W4-1_Atop    | 5' - <b>ATC AGC GTT GGT TGG TGT GGT TGG TTC GCT GAT</b> TTC TAG TAG<br>TCC TCC GAG TTT TTA ATC CAT GAT CCT ACT TTT GGC TAC AGA CTG<br>CAT TTT TTA GAT CCT ATG CGT TCG TT - 3'                                                   |
| W4-2_PB      | 5' - <b>CG CCT AGG TTG GGT AGG GTG GTG GCG</b> TTC TCG GAG GAC TAC<br>TAG TTT TGT AGG ATC ATG GAT TAT TTT AAT GCA GTC TGT AGC CTT<br>TTC GAA CGC ATA GGA TCT TTA <b>GTC CGT GGT AGG GCA GGT TGG<br/>GGT GAC T</b> - 3'          |
| W4-1_Pbot    | 5' - TTC TAG TAG TCC TCC GAG TTT TTA ATC CAT GAT CCT ACT TTT<br>GGC TAC AGA CTG CAT TTT TTA GAT CCT ATG CGT TCG TT <b>CG CCT<br/>AGG TTG GGT AGG GTG GTG GCG</b> - 3'                                                           |
| W4-1_Ptop    | 5' - <b>CG CCT AGG TTG GGT AGG GTG GTG GCG</b> TTC TAG TAG TCC TCC<br>GAG TTT TTA ATC CAT GAT CCT ACT TTT GGC TAC AGA CTG CAT TTT<br>TTA GAT CCT ATG CGT TCG TT - 3'                                                            |
| Antidote     | 5' - CGC ATA GCA T CGC CAC CAC CCT ACC CAA CCT AGG CG - 3'                                                                                                                                                                      |
| Retriever I  | 5' - ACG CTA TCG ACG CCT AGG TTG GGT AGG GTG GTG GCG ATG CTA<br>TGC G - 3'                                                                                                                                                      |
| Retriever II | 5' - CGC ATA GCA TCG CCA CCA CCC TAC CCA ACC TAG GCG TCG ATA<br>CCG T - 3'                                                                                                                                                      |

---

\*: Aptamer A with the 7 bp stem is shown in green, Aptamer B is shown in blue, and Aptamer P is shown in red.

### Non-Denaturing Polyacrylamide Gel Electrophoresis

Gels contained desired amount of acrylamide (19:1, acrylamide:bisacrylamide) in a buffer consisting of 40 mM Tris acetate (pH 8.0), 2 mM EDTA, and 12.5 mM magnesium acetate (TAE/Mg<sup>++</sup>). The annealed sample was mixed in equal volume with tracking dye containing TAE/Mg<sup>++</sup>, 50% glycerol, and 0.2% each of Bromophenol Blue and Xylene Cyanol FF. Gels were run on a Hoefer (Holliston, MA, USA). SE-600 electrophoresis unit at 10 V/cm and cooled via circulating water bath at 4 °C. The gels were then stained with ethidium bromide and imaged using an AlphaImager<sup>®</sup> (ProteinSimple, Santa Clara, CA, USA).

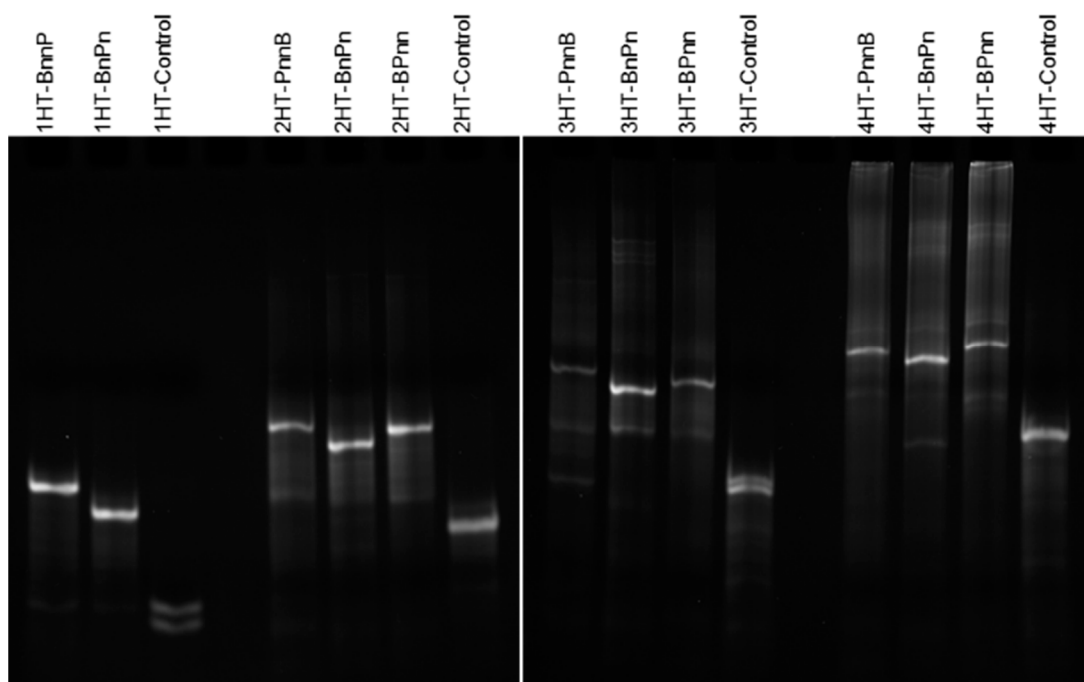

**Figure S1.** 6% non-denaturing polyacrylamide gel electrophoresis images for characterizing the weave tiles with Apt B and Apt P. The control lane contains two non-complementary strands of same length as the participating strands of the corresponding weave tile. The two non-complementary strands have one aptamer each on them. The slower migration of the most prominent band in the weave tile lane indicates the formation of the weave tile. The gel electrophoresis characterization of the weave tiles with Apt B and Apt A has been shown previously [1]. The anticoagulant activity of these constructs is shown in Figure 5 of the main text.

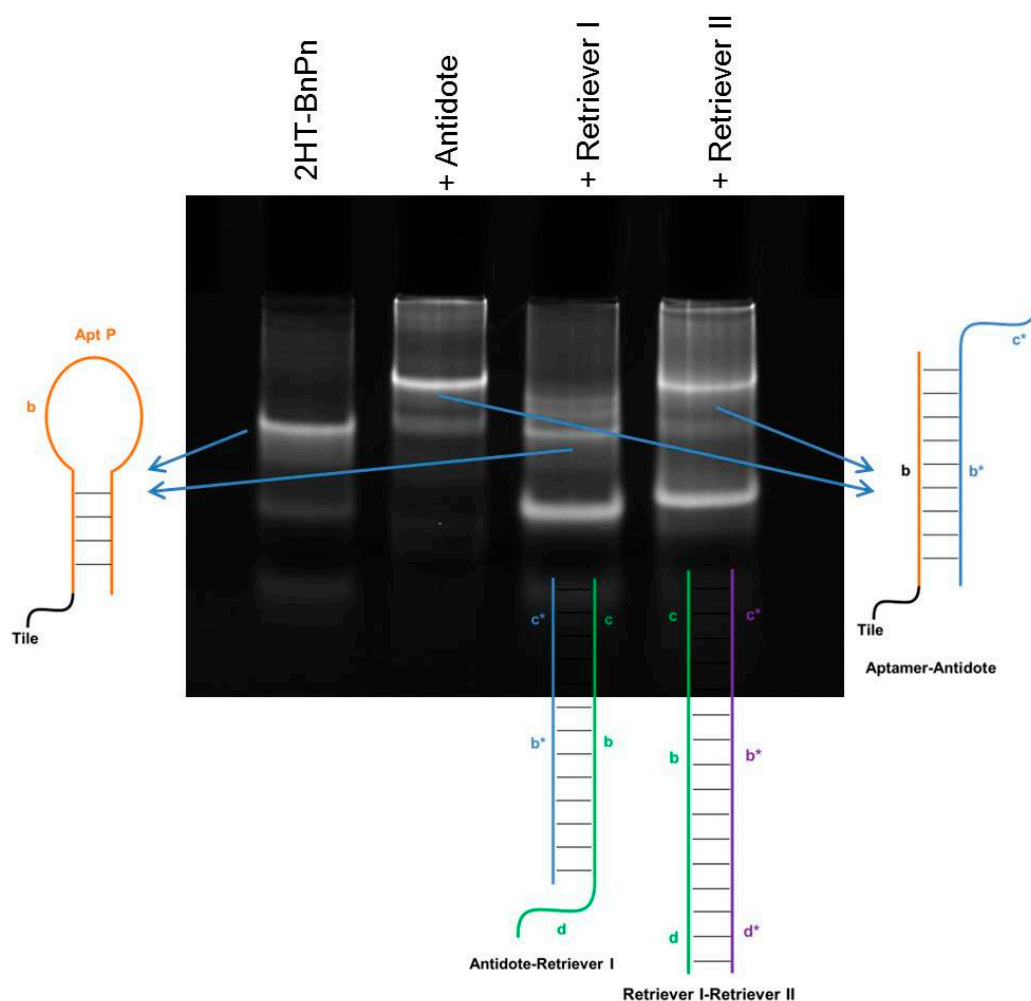

**Figure S2.** 10% non-denaturing polyacrylamide gel electrophoresis images showing migration of the weave tile 2HT-BnPn (lane 1). Antidote binding to Apt P in 2HT-BnPn resulted in slower migration (lane 2). Addition of Retriever I removed the antidote from the complex (lane 3), whereas, addition of Retriever II removed Retriever I, thus freeing up the antidote, which then bound to 2HT-BnPn again (lane 4). Molar ratio was as follows: 2HT-BnPn: Antidote: Retriever I: Retriever II::1:2:2:2. This strategy is schematically illustrated in Figure 6 of the main text, and the results of clotting assay for the same are shown in Figure 7 of the main text.

**Table S1.** Clotting time (in seconds) for the data shown in Figure 3 of the main text.

| Sample         | Trial I | Trial II | Trial III | Trial IV | Trial V | Trial VI | Average | SEM  |
|----------------|---------|----------|-----------|----------|---------|----------|---------|------|
| Buffer Control | 19.1    | 22.6     | 24.8      | 18.4     | 21.1    | 25       | 21.83   | 1.14 |
| Apt B          | 39.8    | 39.9     | 39.3      | 44.5     | 43.6    | 41       | 41.35   | 0.89 |
| Apt A          | 56.4    | 56.9     | 56.6      | 58.7     | 59.6    | 62.9     | 58.52   | 1.02 |
| Apt P          | 107.2   | 110.7    | 108.1     | 110.9    | 114.8   | 117.7    | 111.57  | 1.64 |
| B~A            | 97      | 97.3     | 94.1      | 98.4     | 100.2   | 93.1     | 96.68   | 1.08 |
| B~P            | 189.3   | 193.1    | 189.6     | 172.1    | 178.5   | 179.1    | 183.62  | 3.35 |
|                | Day 1   |          |           |          | Day 2   |          |         |      |

**Table S2.** Clotting time (in seconds) for the data shown in Figure 5 of the main text.

| Sample                                        | Trial 1 | Trial 2 | Trial 3 | Average (Day 1) | Trial 1 | Trial 2 | Trial 3 | Average (Day 2) | Trial 1 | Trial 2 | Trial 3 | Average (Day 3) |
|-----------------------------------------------|---------|---------|---------|-----------------|---------|---------|---------|-----------------|---------|---------|---------|-----------------|
| Buffer Control                                | 27.5    | 26      | 26.7    | 26.73           | 30.4    | 28.9    | 28.5    | 29.27           | 47.7    | 46.6    | 46.2    | 46.83           |
| Apt B                                         | 44.4    | 37.8    | 41.4    | 41.20           | 40      | 40      | 37.9    | 39.30           |         |         |         |                 |
| Apt A                                         | 62.5    | 59.9    | 63.9    | 62.10           | 61.1    | 58.2    | 53.9    | 57.73           |         |         |         |                 |
| Apt P                                         | 104.4   | 104.7   | 100     | 103.03          | 103     | 101.9   | 104.3   | 103.07          |         |         |         |                 |
| 1HT-BnnA                                      | 107.5   | 101     | 96      | 101.50          |         |         |         |                 | 162.3   | 156.7   | 160.6   | 159.87          |
| 1HT-BnAn                                      | 111.8   | 107.3   | 104.4   | 107.83          | 114.7   | 110.9   | 106.6   | 110.73          |         |         |         |                 |
| 1HT-BnnP                                      | 165.2   | 164.8   | 153.3   | 161.10          | 167.9   | 177.9   | 146.9   | 164.23          |         |         |         |                 |
| 1HT-BnPn                                      | 232.3   | 212     | 216.3   | 220.20          | 218.5   | 236.3   | 231.1   | 228.63          |         |         |         |                 |
| 2HT-AnnB                                      | 113.5   | 111.9   | 106.9   | 110.77          | 119.7   | 112.4   | 109.8   | 113.97          |         |         |         |                 |
| 2HT-BnAn                                      | 115.7   | 169.7   | 113.7   | 133.03          | 129.8   | 114.3   | 104.8   | 116.30          |         |         |         |                 |
| 2HT-BAnn                                      | 115.5   | 110     | 111.8   | 112.43          | 128.5   | 118.2   | 111.5   | 119.40          |         |         |         |                 |
| 2HT-PnnB                                      | 126.6   | 136.3   | 101     | 121.30          | 143.2   | 129.8   | 126.9   | 133.30          |         |         |         |                 |
| 2HT-BnPn                                      | 277     | 249.7   | 285.9   | 270.87          | 310.6   | 279.1   | 366.2   | 318.63          |         |         |         |                 |
| 2HT-BPnn                                      | 223.9   | 211.7   | 262.7   | 232.77          | 204     | 212.9   | 222.6   | 213.17          |         |         |         |                 |
| 3HT-AnnB                                      | 125.5   | 102.4   | 103     | 110.30          | 145.7   | 128.3   | 135.4   | 136.47          |         |         |         |                 |
| 3HT-BnAn                                      | 139.3   | 125.3   | 128.7   | 131.10          | 153.5   | 141.5   | 138.7   | 144.57          |         |         |         |                 |
| 3HT-BAnn                                      | 137.5   | 129.2   | 115.6   | 127.43          | 152.4   | 143.9   | 139     | 145.10          |         |         |         |                 |
| 3HT-PnnB                                      | 243.8   | 235.9   | 258.1   | 245.93          | 275.1   | 277.7   | 363.9   | 305.57          |         |         |         |                 |
| 3HT-BnPn                                      | 270.6   | 281.3   | 248     | 266.63          | 289.7   | 274.6   | 316.4   | 293.57          |         |         |         |                 |
| 3HT-BPnn                                      | 225.4   | 232.1   | 206.2   | 221.23          | 344.8   | 251.4   | 271.7   | 289.30          |         |         |         |                 |
| 4HT-AnnB                                      | 109.6   | 110.2   | 111.8   | 110.53          | 151.6   | 150.8   | 145.4   | 149.27          |         |         |         |                 |
| 4HT-BnAn                                      | 161.2   | 160.5   | 166.2   | 162.63          | 170.1   | 161.4   | 157     | 162.83          |         |         |         |                 |
| 4HT-BAnn                                      | 163.3   | 163     | 148.1   | 158.13          | 189.9   | 204.8   | 188.7   | 194.47          |         |         |         |                 |
| 4HT-PnnB                                      | 351.1   | 303.6   | 305     | 319.90          | 334.1   | 337.1   | 382.2   | 351.13          |         |         |         |                 |
| 4HT-BnPn                                      | 323.5   | 270.4   | 301.2   | 298.37          | 384.3   | 369.2   | 300.1   | 351.20          |         |         |         |                 |
| 4HT-BPnn                                      | 321.2   | 311.7   | 316.5   | 316.47          | 356.5   | 336     | 393     | 361.83          |         |         |         |                 |
| Buffer Control<br>(For the following samples) | 22.1    | 23.8    | 23.8    | 23.23           | 23.9    | 24      | 25.7    | 24.53           |         |         |         |                 |
| 2HT-BPPn                                      | 318.7   | 333.3   | 339.6   | 330.53          | 315.4   | 330.3   | 329.9   | 325.20          |         |         |         |                 |
| 2HT-PPPb                                      | 376     | 352     | 349.8   | 359.27          | 348.5   | 348.5   | 406.9   | 367.97          |         |         |         |                 |
| 2HT-PPBB                                      | 415.9   | 422.2   | 399.8   | 412.63          | 420.9   | 425.1   | 404     | 416.67          |         |         |         |                 |
| 2HT-BPPB                                      | 397.5   | 436.8   | 471.4   | 435.23          | 402.3   | 405.6   | 411.6   | 406.50          |         |         |         |                 |
|                                               |         |         | Day 1   |                 |         | Day 2   |         |                 |         |         | Day 3   |                 |

**Table S3.** Relative Anticoagulant Activity (RAA) of the samples from Table S2 and as shown in Figure 5 of the main text. The relative anticoagulant activity is calculated as:  $(T_{\text{sample}} - T_{\text{control}})/T_{\text{control}}$ . Here, T is the clotting time in seconds.

| Sample                                     | RAA (Day 1) | RAA (Day 2) | RAA (Day 3) | Average RAA | SEM      |
|--------------------------------------------|-------------|-------------|-------------|-------------|----------|
| Buffer Control                             | 0           | 0           | 0           |             |          |
| Apt B                                      | 0.541147    | 0.342825    |             | 0.441986    | 0.099161 |
| Apt A                                      | 1.322943    | 0.972665    |             | 1.147804    | 0.175139 |
| Apt P                                      | 2.854115    | 2.52164     |             | 2.687877    | 0.166237 |
| 1HT-BnnA                                   | 2.796758    |             | 2.413523    | 2.605141    | 0.191617 |
| 1HT-BnAn                                   | 3.033666    | 2.783599    |             | 2.908632    | 0.125033 |
| 1HT-BnnP                                   | 5.026185    | 4.611617    |             | 4.818901    | 0.207284 |
| 1HT-BnPn                                   | 7.236908    | 6.812073    |             | 7.02449     | 0.212417 |
| 2HT-AnnB                                   | 3.143392    | 2.894077    |             | 3.018734    | 0.124657 |
| 2HT-BnAn                                   | 3.976309    | 2.973804    |             | 3.475057    | 0.501253 |
| 2HT-BAnn                                   | 3.205736    | 3.079727    |             | 3.142731    | 0.063005 |
| 2HT-PnnB                                   | 3.537406    | 3.55467     |             | 3.546038    | 0.008632 |
| 2HT-BnPn                                   | 9.13217     | 9.887244    |             | 9.509707    | 0.377537 |
| 2HT-BPnn                                   | 7.706983    | 6.283599    |             | 6.995291    | 0.711692 |
| 3HT-AnnB                                   | 3.125935    | 3.66287     |             | 3.394403    | 0.268467 |
| 3HT-BnAn                                   | 3.90399     | 3.939636    |             | 3.921813    | 0.017823 |
| 3HT-BAnn                                   | 3.766833    | 3.957859    |             | 3.862346    | 0.095513 |
| 3HT-PnnB                                   | 8.199501    | 9.440774    |             | 8.820138    | 0.620637 |
| 3HT-BnPn                                   | 8.973815    | 9.030752    |             | 9.002284    | 0.028468 |
| 3HT-BPnn                                   | 7.275561    | 8.884966    |             | 8.080263    | 0.804702 |
| 4HT-AnnB                                   | 3.134663    | 4.100228    |             | 3.617446    | 0.482782 |
| 4HT-BnAn                                   | 5.083541    | 4.563781    |             | 4.823661    | 0.25988  |
| 4HT-BAnn                                   | 4.915212    | 5.644647    |             | 5.279929    | 0.364717 |
| 4HT-PnnB                                   | 10.96633    | 10.99772    |             | 10.98203    | 0.015694 |
| 4HT-BnPn                                   | 10.16085    | 11          |             | 10.58042    | 0.419576 |
| 4HT-BPnn                                   | 10.83791    | 11.36333    |             | 11.10062    | 0.26271  |
| Buffer Control (For the following samples) | 0           | 0           |             |             |          |
| 2HT-BPPn                                   | 13.22669    | 12.25543    |             | 12.74106    | 0.485626 |
| 2HT-PPPB                                   | 14.46341    | 13.99864    |             | 14.23103    | 0.232387 |
| 2HT-PPBB                                   | 16.7604     | 15.9837     |             | 16.37205    | 0.388353 |
| 2HT-BPPB                                   | 17.73314    | 15.56929    |             | 16.65122    | 1.081924 |

**Table S4.** Clotting time (in seconds) for the data shown in Figure 7 of the main text. AD: antidote; R-I: Retriever I; R-II: Retriever II.

| Sample                     | Trial I | Trial II | Trial III | Average (Day 1) | Trial IV | Trial V | Trial VI | Average (Day 2) |
|----------------------------|---------|----------|-----------|-----------------|----------|---------|----------|-----------------|
| Buffer Control             | 23.6    | 23.8     | 23.5      | 23.63           | 23.6     | 23.9    | 24       | 23.83           |
| Apt P                      | 91.7    | 95       | 96.8      | 94.50           | 96.2     | 95.8    | 95.3     | 95.77           |
| Apt P + AD                 | 26.9    | 26.8     | 26.8      | 26.83           | 27.6     | 27.8    | 27.4     | 27.60           |
| Apt P + AD + R-I           | 78.9    | 70.4     | 76.5      | 75.27           | 87.7     | 83.9    | 87.8     | 86.47           |
| Apt P + AD + R-I + R-II    | 31.2    | 31.9     | 31.3      | 31.47           | 32       | 32.4    | 32.9     | 32.43           |
| 2HT-Bnnn                   | 42.4    | 42.3     | 42.6      | 42.43           | 46       | 46.6    | 46.7     | 46.43           |
| 2HT-BnPn                   | 297.8   | 293.3    | 304.5     | 298.53          | 297.8    | 309.1   | 310.2    | 305.70          |
| 2HT-BnPn + AD              | 50.1    | 51       | 51.1      | 50.73           | 52.8     | 53.4    | 55.6     | 53.93           |
| 2HT-BnPn + AD + R-I        | 241.6   | 246.5    | 208.7     | 232.27          | 242.6    | 266.2   | 275.5    | 261.43          |
| 2HT-BnPn + AD + R-I + R-II | 62.4    | 63.5     | 62.9      | 62.93           | 64.2     | 64.9    | 66.2     | 65.10           |
| 2HT-BnnB                   | 61.6    | 63.5     | 63.4      | 62.83           | 66.2     | 68.4    | 68.8     | 67.80           |
| 2HT-BPPB                   | 685.2   | 699.7    | 757.9     | 714.27          | 648.9    | 711.5   | 735.9    | 698.77          |
| 2HT-BPPB + AD              | 89.5    | 84.9     | 86.4      | 86.93           | 85.8     | 87.5    | 89.2     | 87.50           |
| 2HT-BPPB + AD + R-I        | 512.1   | 539.3    | 548.8     | 533.40          | 599.3    | 628.4   | 620.1    | 615.93          |
| 2HT-BPPB + AD + R-I + R-II | 90.2    | 92.5     | 94.2      | 92.30           | 109.9    | 101.7   | 100.7    | 104.10          |
|                            |         |          | Day 1     |                 |          |         | Day 2    |                 |



**Table S5.** Anticoagulant Activity (AA, in percentage) of the samples from Table S4 and as shown in Figure 7 of the main text. The anticoagulant activity is calculated as:  $(T_{\text{sample}} - T_{\text{control}})/(T_{\text{aptamer}} - T_{\text{control}}) \times 100$ . For free Apt P studies, buffer was used as control, and  $T_{\text{aptamer}}$  represents the clotting time of Apt P. For 2HT-BnPn studies, 2HT-Bnnn was used as control, and  $T_{\text{aptamer}}$  represents the clotting time of 2HT-BnPn. Similarly, for 2HT-BPPB studies, 2HT-BnnB was used as control, and  $T_{\text{aptamer}}$  represents the clotting time of 2HT-BPPB.

| Sample                     | AA<br>(Trial I) | AA<br>(Trial II) | AA<br>(Trial III) | AA<br>(Trial IV) | AA<br>(Trial V) | AA<br>(Trial VI) | Average<br>AA | SEM  |
|----------------------------|-----------------|------------------|-------------------|------------------|-----------------|------------------|---------------|------|
| Buffer Control             | -0.05           | 0.24             | -0.19             | -0.32            | 0.09            | 0.23             | 0.00          | 0.09 |
| Apt P                      | 96.05           | 100.71           | 103.25            | 100.60           | 100.05          | 99.35            | 100.00        | 0.96 |
| Apt P + AD                 | 4.61            | 4.47             | 4.47              | 5.24             | 5.51            | 4.96             | 4.88          | 0.18 |
| Apt P + AD + R-I           | 77.99           | 65.99            | 74.60             | 88.79            | 83.50           | 88.92            | 79.97         | 3.64 |
| Apt P + AD + R-I + R-II    | 10.68           | 11.67            | 10.82             | 11.35            | 11.91           | 12.60            | 11.50         | 0.29 |
| 2HT-Bnnn                   | -0.01           | -0.05            | 0.07              | -0.17            | 0.06            | 0.10             | 0.00          | 0.04 |
| 2HT-BnPn                   | 99.71           | 97.96            | 102.33            | 96.95            | 101.31          | 101.74           | 100.00        | 0.89 |
| 2HT-BnPn + AD              | 2.99            | 3.35             | 3.38              | 2.46             | 2.69            | 3.54             | 3.07          | 0.18 |
| 2HT-BnPn + AD + R-I        | 77.77           | 79.68            | 64.92             | 75.66            | 84.76           | 88.35            | 78.53         | 3.32 |
| 2HT-BnPn + AD + R-I + R-II | 7.80            | 8.23             | 7.99              | 6.85             | 7.12            | 7.62             | 7.60          | 0.21 |
| 2HT-BnnB                   | -0.19           | 0.10             | 0.09              | -0.25            | 0.10            | 0.16             | 0.00          | 0.07 |
| 2HT-BPPB                   | 95.54           | 97.76            | 106.70            | 92.10            | 102.02          | 105.89           | 100.00        | 2.39 |
| 2HT-BPPB + AD              | 4.09            | 3.39             | 3.62              | 2.85             | 3.12            | 3.39             | 3.41          | 0.17 |
| 2HT-BPPB + AD + R-I        | 68.97           | 73.14            | 74.60             | 84.24            | 88.85           | 87.53            | 79.55         | 3.41 |
| 2HT-BPPB + AD + R-I + R-II | 4.20            | 4.55             | 4.82              | 6.67             | 5.37            | 5.21             | 5.14          | 0.35 |
|                            |                 | Day 1            |                   |                  | Day 2           |                  |               |      |

## References

1. Rangnekar, A.; Zhang, A.M.; Li, S.S.; Bompiani, K.M.; Hansen, M.N.; Gothelf, K.V.; Sullenger, B.A.; LaBeau, T.H. Increased anticoagulant activity of thrombin-binding DNA aptamers by nanoscale organization on DNA nanostructures. *Nanomedicine* **2012**, *8*, 673–681.
